# Supplementary material
Source: PubMed Central journal article supplement (PMC5726490)
Supplement: NIHMS75282-supplement-Appendix_1.pdf [file NIHMS75282-supplement-Appendix_1.pdf]

| Soil variable                                     | df <sub>time</sub> | F <sub>time</sub> | P      | Observation year |              |              |             |
|---------------------------------------------------|--------------------|-------------------|--------|------------------|--------------|--------------|-------------|
|                                                   |                    |                   |        | 2010             | 2011         | 2012         | 2013        |
| pH (A horizon)                                    | 2.597              | 6.837             | <0.001 | 4.59 ± 0.04      | 4.54 ± 0.03  | 4.63 ± 0.04  | 4.69 ± 0.04 |
| pH (B horizon)                                    | 2.823              | 9.634             | <0.001 | 4.39 ± 0.02      | 4.29 ± 0.02  | 4.35 ± 0.02  | 4.37 ± 0.02 |
| C:N ratio (A horizon)                             | 2                  | 141.239           | <0.001 | 11.26 ± 0.23     | 16.35 ± 0.29 | 15.81 ± 0.27 |             |
| C:N ratio (B horizon)                             | 2                  | 292.004           | <0.001 | 7.38 ± 0.17      | 16.59 ± 0.51 | 18.25 ± 0.36 |             |
| Organic C (%; A horizon)                          | 1.823              | 3.285             | 0.047  | 8.01 ± 0.25      | 7.5 ± 0.2    | 7.44 ± 0.27  |             |
| Organic C (%; B horizon)                          | 1.699              | 6.947             | 0.003  | 3.09 ± 0.15      | 2.69 ± 0.09  | 2.84 ± 0.09  |             |
| Total N (%; A horizon)                            | 1.307              | 107.053           | <0.001 | 0.72 ± 0.02      | 0.46 ± 0.01  | 0.47 ± 0.02  |             |
| Total N (%; B horizon)                            | 1.038              | 228.865           | <0.001 | 0.42 ± 0.02      | 0.16 ± 0.01  | 0.16 ± 0.01  |             |
| Ca <sup>2+</sup> (mg g <sup>-1</sup> ; A horizon) | 2                  | 5.064             | 0.008  | 819.5 ± 42.8     | 857.3 ± 30.2 | 968.7 ± 49.8 |             |
| Ca <sup>2+</sup> (mg g <sup>-1</sup> ; B horizon) | 2                  | 135.567           | <0.001 | 107.3 ± 8.7      | 247.4 ± 9.8  | 273.7 ± 10.7 |             |
| Mg <sup>2+</sup> (mg g <sup>-1</sup> ; A horizon) | 1.787              | 8.497             | 0.001  | 139.6 ± 5.6      | 137.4 ± 3.8  | 160.8 ± 6.1  |             |
| Mg <sup>2+</sup> (mg g <sup>-1</sup> ; B horizon) | 2                  | 208.368           | <0.001 | 19.58 ± 1.77     | 58.07 ± 1.95 | 54.69 ± 1.67 |             |
| P (mg g <sup>-1</sup> ; A horizon)                | 1.394              | 14.983            | <0.001 | 17.65 ± 2.09     | 27.56 ± 1.31 | 23.42 ± 1.82 |             |
| P (mg g <sup>-1</sup> ; B horizon)                | 2                  | 51.29             | <0.001 | 8.6 ± 1.47       | 20.8 ± 1.79  | 19.27 ± 1.92 |             |
| K <sup>+</sup> (mg g <sup>-1</sup> ; A horizon)   | 2                  | 1.232             | 0.297  | 227.7 ± 8.4      | 215.3 ± 7.6  | 221.1 ± 8.9  |             |
| K <sup>+</sup> (mg g <sup>-1</sup> ; B horizon)   | 2                  | 7.708             | 0.001  | 70.39 ± 2.84     | 80.98 ± 2.84 | 77.84 ± 2.69 |             |
