# Supplementary material
Source: PubMed Central journal article supplement (PMC5726490)
Supplement: NIHMS75282-supplement-Appendix_3.pdf [file NIHMS75282-supplement-Appendix_3.pdf]

| Annual species                  | Perennial species                |
|---------------------------------|----------------------------------|
| <i>Alliaria petiolata</i>       | <i>Acer campestre</i>            |
| <i>Arabis glabra</i>            | <i>Acer platanoides</i>          |
| <i>Cardamine impatiens</i>      | <i>Acer pseudoplatanus</i>       |
| <i>Chenopodium album</i> agg.   | <i>Agrostis capillaris</i>       |
| <i>Conyza canadensis</i>        | <i>Achillea millefolium</i>      |
| <i>Erechtites hieraciifolia</i> | <i>Alliaria petiolata</i>        |
| <i>Fallopia convolvulus</i>     | <i>Anthoxanthum odoratum</i>     |
| <i>Galeopsis tetrahit</i>       | <i>Arabis pauciflora</i> *       |
| <i>Galium aparine</i>           | <i>Arrhenatherum elatius</i>     |
| <i>Geranium robertianum</i>     | <i>Avenella flexuosa</i>         |
| <i>Impatiens parviflora</i>     | <i>Betula pendula</i>            |
| <i>Lactuca serriola</i>         | <i>Brachypodium sylvaticum</i>   |
| <i>Lapsana communis</i>         | <i>Calamagrostis arundinacea</i> |
| <i>Melampyrum pratense</i>      | <i>Calamagrostis epigejos</i>    |
| <i>Moehringia trinervia</i>     | <i>Calluna vulgaris</i>          |
| <i>Myosotis arvensis</i>        | <i>Campanula rotundifolia</i>    |
| <i>Persicaria hydropiper</i>    | <i>Carex caryophyllea</i>        |
| <i>Solanum nigrum</i>           | <i>Carex humilis</i> *           |
| <i>Sonchus oleraceus</i>        | <i>Carpinus betulus</i>          |
| <i>Stellaria media</i>          | <i>Cotoneaster integerrimus</i>  |
| <i>Torilis japonica</i>         | <i>Crataegus spec.</i>           |
| <i>Trifolium arvense</i>        | <i>Cytisus nigricans</i>         |
| <i>Vicia tetrasperma</i>        | <i>Dactylis polygama</i>         |
| <i>Viola arvensis</i>           | <i>Dianthus carthusianorum</i>   |
|                                 | <i>Dryopteris carthusiana</i>    |
|                                 | <i>Dryopteris filix-mas</i>      |
|                                 | <i>Epipactis helleborine</i> *   |
|                                 | <i>Eryngium campestre</i>        |
|                                 | <i>Festuca ovina</i>             |
|                                 | <i>Fragaria moschata</i>         |
|                                 | <i>Fragaria vesca</i>            |
|                                 | <i>Fraxinus excelsior</i>        |
|                                 | <i>Galium album</i>              |
|                                 | <i>Galium pumilum</i>            |
|                                 | <i>Galium rotundifolium</i>      |
|                                 | <i>Galium verum</i>              |
|                                 | <i>Genista pilosa</i>            |
|                                 | <i>Genista tinctoria</i>         |
|                                 | <i>Geum urbanum</i>              |
|                                 | <i>Hedera helix</i>              |
|                                 | <i>Hieracium lachenalii</i>      |
|                                 | <i>Hieracium maculatum</i> *     |
|                                 | <i>Hieracium murorum</i>         |
|                                 | <i>Hieracium sabaudum</i>        |
|                                 | <i>Hieracium umbellatum</i>      |
|                                 | <i>Hypericum perforatum</i>      |
|                                 | <i>Juncus tenuis</i>             |
|                                 | <i>Juniperus communis</i>        |
|                                 | <i>Ligustrum vulgare</i>         |
|                                 | <i>Linaria vulgaris</i>          |
|                                 | <i>Luzula campestris</i> agg.    |
|                                 | <i>Luzula luzuloides</i>         |
|                                 | <i>Lychnis viscaria</i>          |
|                                 | <i>Malus domestica</i>           |
|                                 | <i>Melica nutans</i>             |

*Melica uniflora*  
*Moehringia trinervia*  
*Mycelis muralis*  
*Neottia nidus-avis* \*  
*Phleum phleoides*  
*Pimpinella saxifraga*  
*Pinus sylvestris*  
*Platanthera bifolia* \*  
*Poa angustifolia*  
*Poa compressa*  
*Poa nemoralis*  
*Poa pratensis*  
*Polygonatum odoratum*  
*Polypodium vulgare*  
*Prunus avium*  
*Prunus spinosa*  
*Pseudolysimachion spicatum* ssp. *spicatum* \*  
*Pyrus* spec.  
*Quercus cerris*  
*Quercus pubescens*  
*Quercus* spec.  
*Rhamnus cathartica*  
*Ribes rubrum*  
*Robinia pseudacacia*  
*Rosa canina* agg.  
*Rubus fruticosus* agg.  
*Rubus idaeus*  
*Rumex acetosella*  
*Salix* spec.  
*Silene nutans*  
*Sorbus aria* agg.  
*Sorbus aucuparia*  
*Taraxacum* sect. *Ruderalia*  
*Tilia cordata*  
*Trifolium alpestre*  
*Urtica dioica*  
*Verbascum chaixii* ssp. *austriacum* \*  
*Veronica chamaedrys*  
*Veronica officinalis*  
*Viola odorata*  
*Viola riviniana*

---
