# Supplementary material
Source: PubMed Central journal article supplement (PMC5726490)

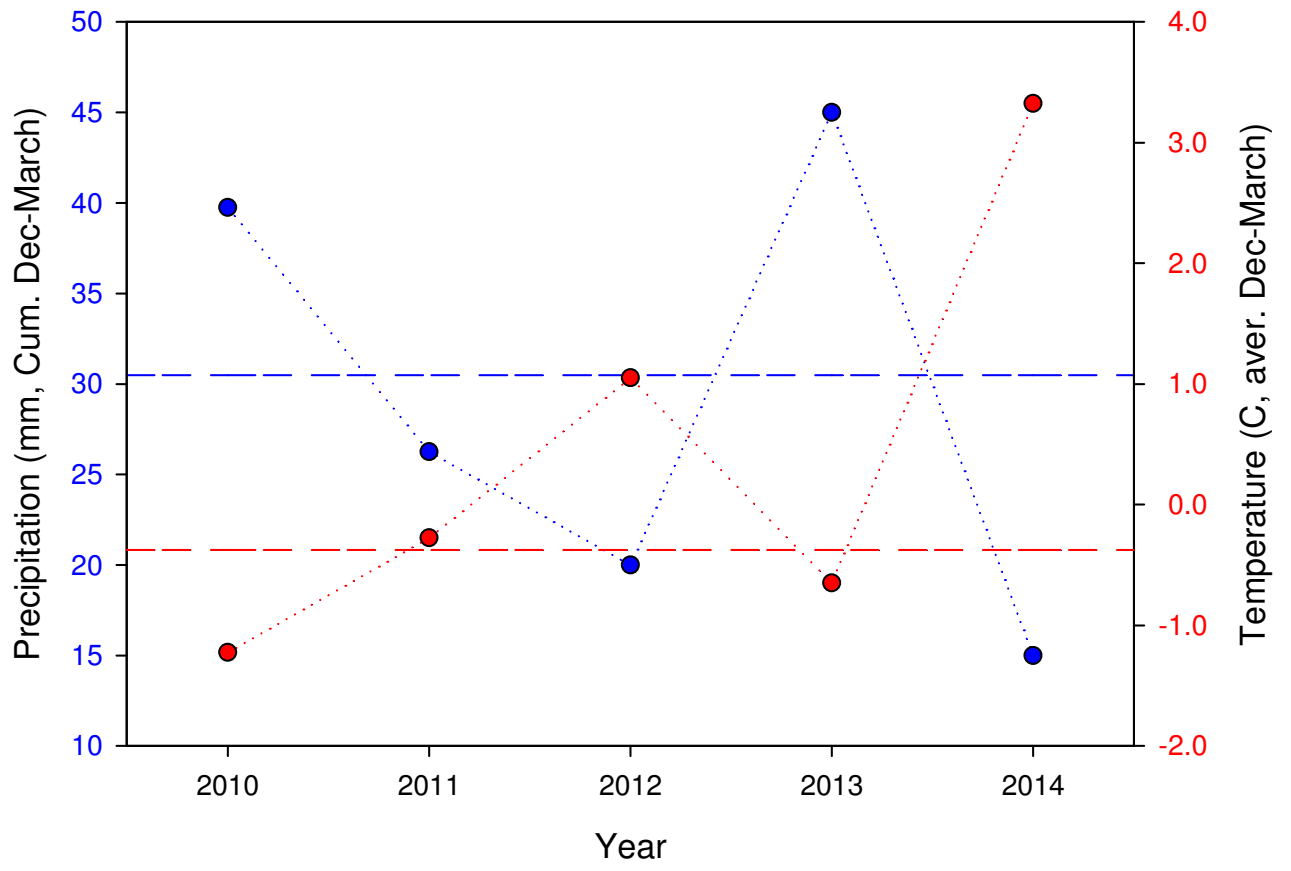

Supplement: NIHMS75282-supplement-Appendix_2.pdf [file NIHMS75282-supplement-Appendix_2.pdf]
